# Supplementary material for: Automated detection of axonal damage along white matter tracts in acute severe traumatic brain injury
Source: bioRxiv or medRxiv preprint supplement (doi:10.1101/2022.03.09.22271989), 2022-06-29
Supplement: Supplementary file [file media-1.pdf]

# Automated detection of axonal injury along white matter tracts in acute severe head trauma

## Supplementary Information

### Supplementary Tables

| ID | Number of TRACULA Reconstructed Tracts |                                                                                     |                       |               | Focal Lesions on<br>Acute Structural MRI                               |
|----|----------------------------------------|-------------------------------------------------------------------------------------|-----------------------|---------------|------------------------------------------------------------------------|
|    | i)<br>Complete                         | i)<br>Reinitialized                                                                 | iii)<br>Incomplete    | iv)<br>Failed |                                                                        |
| P1 | 0*                                     | N/A                                                                                 | N/A                   | N/A           | R frontal and parietal contusions; small R frontal subdural hemorrhage |
| P2 | 40                                     | 0                                                                                   | 0                     | 0             | L frontal EVD tract                                                    |
| P3 | 40                                     | 0                                                                                   | 0                     | 0             | None                                                                   |
| P4 | 38                                     | 2<br>[MCP, LH<br>CST]                                                               | 2<br>[MCP, LH<br>CST] | 0             | Bifrontal contusions; R frontoparietal contusion                       |
| P5 | 37                                     | 3<br>[LH CST,<br>ACOMM, RH<br>FAT]                                                  | 0                     | 0             | L frontal contusion                                                    |
| P6 | 40                                     | 0                                                                                   | 0                     | 0             | L frontal contusion                                                    |
| P7 | 33                                     | 7<br>[CC<br>BODYPM,<br>ACOMM, LH<br>SLF1, RH<br>CST, RH FAT,<br>LH FAT, RH<br>SLF1, | 0                     | 0             | None                                                                   |
| P8 | 37                                     | 3<br>[LH CST, RH<br>CST, RH<br>MLF]                                                 | 0                     | 0             | R posterior temporal contusion; L anterior temporal contusion          |
| P9 | 37                                     | 3<br>[RH CST, RH<br>ECM, RH<br>SLF1]                                                | 0                     | 0             | Hemorrhage in splenium of corpus callosum                              |

|             |              |                                                                       |                  |                                         |                                                                                                                        |
|-------------|--------------|-----------------------------------------------------------------------|------------------|-----------------------------------------|------------------------------------------------------------------------------------------------------------------------|
| P10         | 37           | 3<br>[ACOMM,<br>RH ECM, RH<br>UF]                                     | 0                | 2<br>[ACOMM,<br>RH UF]                  | R anterior temporal<br>contusion; L tentorial<br>subdural hemorrhage                                                   |
| P11         | 38           | 2<br>[LH CBD,<br>ACOMM]                                               | 0                | 0                                       | L temporo-parietal<br>contusion; R thalamic<br>hemorrhage                                                              |
| P12         | 40           | 0                                                                     | 0                | 0                                       | R anterior temporal<br>contusion                                                                                       |
| P13         | 37           | 3<br>[LH CST, RH<br>CST, LH CBV]                                      | 0                | 0                                       | L frontal contusion                                                                                                    |
| P14         | 34           | 6<br>[RH SLF1,<br>ACOMM, CC<br>BODY PF, RH<br>SLF2, RH<br>FAT, RH UF] | 1<br>[RH SLF1]   | 3<br>[ACOMM,<br>CC BODY PF,<br>RH SLF2] | R frontal contusion; L<br>frontal and L mesial<br>temporal contusions                                                  |
| P15         | 39           | 1 [ LH CBV]                                                           | 0                | 0                                       | L insular contusion;<br>R frontal EVD tract                                                                            |
| P16         | 40           | 0                                                                     | 0                | 0                                       | None                                                                                                                   |
| P17         | 35           | 5<br>[RH CBV, RH<br>CBD, RH<br>EMC, RH OR,<br>RH FAT]                 | 0                | 0                                       | R anterior temporal<br>and L posterior<br>temporal contusions;<br>R frontal and L<br>temporal subdural<br>hemorrhages. |
| P18         | 36           | 4<br>[CC<br>BODYPM, CC<br>ROSTRUM,<br>LH FAT, LH<br>CST]              | 0                | 0                                       | L temporal contusion;<br>L frontal EVD tract.                                                                          |
| <b>Mean</b> | <b>37.52</b> | <b>2.47</b>                                                           | <b>0.17</b>      | <b>0.29</b>                             | -                                                                                                                      |
| <b>SD</b>   | <b>2.18</b>  | <b>2.182821</b>                                                       | <b>0.5285952</b> | <b>0.848875084</b>                      | -                                                                                                                      |

**Supplementary Table S1.** The table reports **i)** the number of tracts for each patient that were reconstructed completely and accurately in TRACULA without the need for reinitialization; **ii)** the tracts that were reinitialized upon visual inspection; **iii)** the tracts that resulted in partial reconstructions after reinitialization; **iv)** the tracts that resulted in failed reconstructions after reinitialization. The presence and location of focal lesions are reported for each patient. \*In this subject (P1) the FreeSurfer “recon-all” pipeline failed due to lesion and it was thus not possible to run the TRACULA pipeline. EVD = external ventricular drain. SD: standard deviation. **Tracts abbreviations:** ACOMM: anterior commissure; AF: arcuate fasciculus; AR: acoustic radiation; ATR: anterior thalamic radiation; CC BODYC: central section of the body of the CC; CC BODYP: parietal section of the body of the CC; CC BODYPF: prefrontal section of the body of the CC; CC BODYPM: premotor section of the body of the CC; CC BODYT: temporal section of the body of the CC; CC GENU: genu of the CC; CC ROSTRUM: rostrum of the CC; CC SPLENIUM: splenium of the CC; CBD: dorsal portion of cingulum bundle; CBV: ventral portion of the cingulum bundle; CC: corpus callosum; CST: cortico-spinal tract; EMC: extreme capsule; FAT: frontal Aslant tract; ILF: inferior longitudinal fasciculus; LH: left hemisphere; ILF: middle longitudinal fasciculus; OR: optic radiation; RH: right hemisphere; SLF I,II,III: first, second, and third branch of the superior longitudinal fasciculus; UF: uncinete fasciculus.

| <b>Metric</b> | <b>Tract</b> | <b>W</b>  | <b>p-value</b> |
|---------------|--------------|-----------|----------------|
| FA_0          | CC BODYPM    | 0.8807721 | 0.0017522      |
| FA_0          | RH UF        | 0.916552  | 0.0147221      |
| FA_0          | LH AR        | 0.9212808 | 0.0198839      |
| FA_0          | LH EMC       | 0.9320967 | 0.0401684      |
| FA_0          | RH SLF2      | 0.9262095 | 0.0273236      |
| FA_0          | RH CBV       | 0.9236934 | 0.023218       |
| FA_0          | LH CBV       | 0.9285724 | 0.031871       |
| FA_1          | RH SLF3      | 0.8820088 | 0.0018781      |
| FA_1          | CC GENU      | 0.8516014 | 0.0003693      |
| FA_1          | RH CBD       | 0.9334387 | 0.0438909      |
| FA_1          | CC BODYC     | 0.9145991 | 0.0130204      |
| FA_1          | ACOMM        | 0.9073055 | 0.0082862      |
| FA_1          | LH SLF2      | 0.9322933 | 0.0406927      |
| FA_2          | RH AR        | 0.9312109 | 0.0378918      |
| FA_2          | RH CBD       | 0.9313078 | 0.0381343      |
| FA_2          | CC SPLENIUM  | 0.9324933 | 0.0412334      |
| FA_2          | RH SLF1      | 0.9267231 | 0.0282511      |
| FA_2          | RH CST       | 0.8761603 | 0.0013563      |
| FA_2          | CC BODYC     | 0.9220161 | 0.0208435      |
| FA_2          | ACOMM        | 0.9217503 | 0.0204911      |
| FA_3          | RH ATR       | 0.9114721 | 0.0107128      |
| FA_3          | MCP          | 0.9108586 | 0.010313       |
| FA_3          | LH CBD       | 0.8941281 | 0.0037642      |
| FA_3          | CC BODYC     | 0.9137886 | 0.0123761      |
| FA_3          | LH MLF       | 0.9151347 | 0.0134654      |
| FA_3          | RH CBV       | 0.8393757 | 0.0002004      |
| FA_3          | LH CBV       | 0.8521664 | 0.0003801      |
| MD_0          | LH SLF3      | 0.8694882 | 0.0009427      |
| MD_0          | CC BODYPF    | 0.8447102 | 0.0002609      |
| MD_0          | LH FAT       | 0.9088278 | 0.0090978      |
| MD_0          | RH SLF3      | 0.7399372 | 2.79E-06       |
| MD_0          | CC GENU      | 0.928408  | 0.0315307      |
| MD_0          | LH AR        | 0.9332277 | 0.0432828      |
| MD_0          | RH CBD       | 0.8790717 | 0.0015936      |
| MD_0          | RH SLF2      | 0.9299652 | 0.0349143      |
| MD_0          | LH OR        | 0.8745909 | 0.0012442      |
| MD_0          | LH CST       | 0.928028  | 0.0307579      |
| MD_0          | RH CBV       | 0.8323573 | 0.0001426      |
| MD_0          | CC BODYT     | 0.8907428 | 0.0030908      |
| MD_0          | LH CBV       | 0.8262106 | 0.0001064      |
| MD_1          | CC BODYPF    | 0.9043596 | 0.006925       |
| MD_1          | RH MLF       | 0.9168459 | 0.0149978      |
| MD_1          | RH UF        | 0.903201  | 0.0064562      |
| MD_1          | LH ILF       | 0.907908  | 0.0085979      |
| MD_1          | LH UF        | 0.9124511 | 0.0113851      |
| MD_1          | ACOMM        | 0.8992136 | 0.0050829      |
| MD_1          | RH AF        | 0.8600684 | 0.0005717      |

|      |          |           |           |
|------|----------|-----------|-----------|
| MD_1 | LH MLF   | 0.8642138 | 0.0007111 |
| MD_1 | CC BODYT | 0.917487  | 0.0156181 |
| MD_2 | RH ATR   | 0.9191426 | 0.0173478 |
| MD_2 | LH OR    | 0.5514259 | 1E-08     |
| MD_2 | RH SLF1  | 0.9067864 | 0.0080273 |
| MD_2 | LH ILF   | 0.7205661 | 1.36E-06  |
| MD_2 | RH CST   | 0.9178838 | 0.0160154 |
| MD_2 | LH SLF2  | 0.9212015 | 0.0197832 |
| MD_2 | CC BODYT | 0.9194121 | 0.0176478 |
| MD_3 | LH SLF3  | 0.8728746 | 0.0011327 |
| MD_3 | RH SLF3  | 0.8530392 | 0.0003974 |
| MD_3 | RH FAT   | 0.8866142 | 0.0024378 |
| MD_3 | RH ILF   | 0.7975626 | 2.901E-05 |
| MD_3 | LH SLF1  | 0.9349226 | 0.0484249 |
| MD_3 | LH AR    | 0.8107626 | 5.212E-05 |
| MD_3 | RH AR    | 0.8252399 | 0.0001016 |
| MD_3 | RH EMC   | 0.9247809 | 0.0249073 |
| MD_3 | LH OR    | 0.7463136 | 3.56E-06  |
| MD_3 | LH ILF   | 0.7221288 | 1.44E-06  |
| MD_3 | ACOMM    | 0.9195157 | 0.0177646 |
| MD_3 | LH MLF   | 0.8449381 | 0.0002639 |
| MD_3 | RH CBV   | 0.8811756 | 0.0017923 |

**Supplementary Table S2.** The table reports the tracts that for each dMRI metric (FA\_0, FA\_1, FA\_2, FA\_3, MD\_0, MD\_1, MD\_2, MD\_3) showed that the distribution of their values across the controls departed significantly from normality (Shapiro-Wilk test,  $p < 0.05$ ). W- and p-values are reported for each tract. For these tracts, a rank-based inverse normal transformation was applied to the data for both controls and patients. ACOMM: anterior commissure; AF: arcuate fasciculus; AR: acoustic radiation; ATR: anterior thalamic radiation; CC BODYC: central section of the body of the CC; CC BODYP: parietal section of the body of the CC; CC BODYPF: prefrontal section of the body of the CC; CC BODYPM: premotor section of the body of the CC; CC BODYT: temporal section of the body of the CC; CC GENU: genu of the CC; CC ROSTRUM: rostrum of the CC; CC SPLENIUM: splenium of the CC; CBD: dorsal portion of cingulum bundle; CBV: ventral portion of the cingulum bundle; CC: corpus callosum; CST: cortico-spinal tract; EMC: extreme capsule; FAT: frontal Aslant tract; ILF: inferior longitudinal fasciculus; LH: left hemisphere; ILF: middle longitudinal fasciculus; OR: optic radiation; RH: right hemisphere; SLF I,II,III: first, second, and third branch of the superior longitudinal fasciculus; UF: uncinata fasciculus.

| Subject | Group    | Average Rotation | Average Translation | Portion of Slices with signal drop-out | Drop-out Severity | TMI       |
|---------|----------|------------------|---------------------|----------------------------------------|-------------------|-----------|
| 1       | Controls | 0.001727         | 0.418448            | 0.000000                               | 1.00000           | 1.03797   |
| 2       | Controls | 0.001329         | 0.319263            | 0.000000                               | 1.00000           | -0.197668 |
| 3       | Controls | 0.003071         | 0.355562            | 0.000000                               | 1.00000           | 1.82382   |
| 4       | Controls | 0.001846         | 0.352028            | 0.000000                               | 1.00000           | 0.589744  |
| 5       | Controls | 0.001936         | 0.452903            | 0.000000                               | 1.00000           | 1.53774   |
| 6       | Controls | 0.001706         | 0.384086            | 0.000000                               | 1.00000           | 0.724929  |
| 7       | Controls | 0.001317         | 0.949004            | 0.000000                               | 1.00000           | 5.15599   |
| 8       | Controls | 0.001924         | 0.282322            | 0.000000                               | 1.00000           | 0.0722552 |

|     |          |          |          |          |         |            |
|-----|----------|----------|----------|----------|---------|------------|
| 9   | Controls | 0.001469 | 0.240727 | 0.000000 | 1.00000 | -0.7291    |
| 10  | Controls | 0.001356 | 0.428688 | 0.000000 | 1.00000 | 0.760612   |
| 11  | Controls | 0.002197 | 0.274383 | 0.000000 | 1.00000 | 0.272836   |
| 12  | Controls | 0.001266 | 0.269774 | 0.000000 | 1.00000 | -0.681865  |
| 13  | Controls | 0.001247 | 0.356736 | 0.000000 | 1.00000 | 0.0403459  |
| 14  | Controls | 0.001499 | 0.230597 | 0.000000 | 1.00000 | -0.894333  |
| 15  | Controls | 0.001676 | 0.230809 | 0.000000 | 1.00000 | -0.689606  |
| 16  | Controls | 0.001565 | 0.321352 | 0.000000 | 1.00000 | -0.0188977 |
| 17  | Controls | 0.002104 | 0.260174 | 0.000000 | 1.00000 | 0.0574637  |
| 18  | Controls | 0.001334 | 0.208548 | 0.000000 | 1.00000 | -1.13678   |
| 19  | Controls | 0.002046 | 0.329952 | 0.000000 | 1.00000 | 0.597815   |
| 20  | Controls | 0.002134 | 0.232391 | 0.000000 | 1.00000 | -0.146972  |
| 21  | Controls | 0.001854 | 0.273294 | 0.000000 | 1.00000 | -0.0734511 |
| 22  | Controls | 0.003250 | 0.242338 | 0.345349 | 1.15499 | 1.03516    |
| 23  | Controls | 0.002197 | 0.196277 | 0.000000 | 1.00000 | -0.392795  |
| 24  | Controls | 0.002040 | 0.234621 | 0.000000 | 1.00000 | -0.219742  |
| 25  | Controls | 0.001960 | 0.286823 | 0.000000 | 1.00000 | 0.146285   |
| 26  | Controls | 0.001193 | 0.243690 | 0.000000 | 1.00000 | -0.976021  |
| 27  | Controls | 0.001523 | 0.237298 | 0.000000 | 1.00000 | -0.705873  |
| 28  | Controls | 0.001477 | 0.361191 | 0.000000 | 1.00000 | 0.304468   |
| 29  | Controls | 0.001706 | 0.271702 | 0.000000 | 1.00000 | -0.232331  |
| 30  | Controls | 0.002420 | 0.290654 | 0.000000 | 1.00000 | 0.631097   |
| 31  | Controls | 0.001344 | 0.282981 | 0.000000 | 1.00000 | -0.492588  |
| 32  | Controls | 0.001116 | 0.237358 | 0.000000 | 1.00000 | -1.10542   |
| 33  | Controls | 0.001482 | 0.329762 | 0.213220 | 1.16272 | 0.0416457  |
| P2  | Patients | 0.002398 | 0.319144 | 0.000000 | 1.00000 | 0.851761   |
| P3  | Patients | 0.002449 | 0.242368 | 0.000000 | 1.00000 | 0.248332   |
| P4  | Patients | 0.014575 | 0.896906 | 0.134108 | 1.14880 | 17.7473    |
| P5  | Patients | 0.024903 | 1.010200 | 0.000000 | 1.00000 | 28.8665    |
| P6  | Patients | 0.002177 | 0.180212 | 0.000000 | 1.00000 | -0.549083  |
| P7  | Patients | 0.024673 | 0.908842 | 0.128260 | 1.07433 | 27.7767    |
| P8  | Patients | 0.001907 | 0.290166 | 0.000000 | 1.00000 | 0.121952   |
| P9  | Patients | 0.009026 | 0.282405 | 0.000000 | 1.00000 | 7.05599    |
| P10 | Patients | 0.008497 | 0.471386 | 0.000000 | 1.00000 | 8.14538    |

|     |          |          |          |          |         |           |
|-----|----------|----------|----------|----------|---------|-----------|
| P11 | Patients | 0.001599 | 0.275717 | 0.021505 | 1.00446 | -0.303609 |
| P12 | Patients | 0.000872 | 0.219660 | 0.000000 | 1.00000 | -1.49567  |
| P13 | Patients | 0.002152 | 0.269136 | 0.000000 | 1.00000 | 0.184329  |
| P14 | Patients | 0.001000 | 0.227638 | 0.000000 | 1.00000 | -1.30255  |
| P15 | Patients | 0.000921 | 0.215866 | 0.000000 | 1.00000 | -1.48044  |
| P16 | Patients | 0.007765 | 0.325994 | 0.000000 | 1.00000 | 6.1873    |
| P17 | Patients | 0.004763 | 0.348514 | 0.000000 | 1.00000 | 3.42733   |
| P18 | Patients | 0.013854 | 0.933081 | 0.000000 | 1.00000 | 17.3465   |

**Supplementary Table S3.** The table reports the MRI head motion measures as extracted from *eddy* in FSL 6.0.1. for each subject in the study. The total motion index (TMI) is a composite score of four motion measures: i) average volume-by-volume rotation, ii) average volume-by-volume translation, iii) percentage of slices with signal drop-out, and iv) signal drop-out severity.

| Variables                                 | <i>rho</i> | <i>p</i> |
|-------------------------------------------|------------|----------|
| Days in coma & GCS Total                  | -0.81      | < 0.001  |
| Days in coma & CRS-R Total                | -0.82      | < 0.001  |
| GCS Total & CRS-R Total                   | 0.97       | < 0.001  |
| GCS Total & Days to MRI                   | 0.54       | < 0.05   |
| Days to MRI & TMI                         | 0.53       | < 0.05   |
| Days to command-following & CRS-R-R Total | -0.57      | < 0.05   |
| Days in coma & Days to command-following  | 0.58       | < 0.05   |

**Supplementary Table S4. Correlations showing significant relationships between dependent, independent, and potential confounding variables.** CRS-R = Coma Recovery Scale-Revised, GCS = Glasgow Coma Scale, TMI = Total Motion Index

| Variables                                                | <i>rho</i> | <i>p</i> |
|----------------------------------------------------------|------------|----------|
| Average $D^2_M$ of MT tracts & N of affected MT tracts   | 0.80       | < 0.001  |
| Average $D^2_M$ of LCT tracts & N of affected LCT tracts | 0.94       | < 0.001  |
| Average $D^2_M$ of LPT tracts & N LPT tracts             | 0.84       | < 0.001  |

**Supplementary Table S5. Correlations showing significant relationships between dependent, independent, and potential confounding variables for the language and motor tract subset analyses.** MT = Motor tracts, LCT = Language Comprehension tracts, LPT = Language Production tracts, N = number,  $D^2_M$  = Mahalanobis distance

## Supplementary Figures

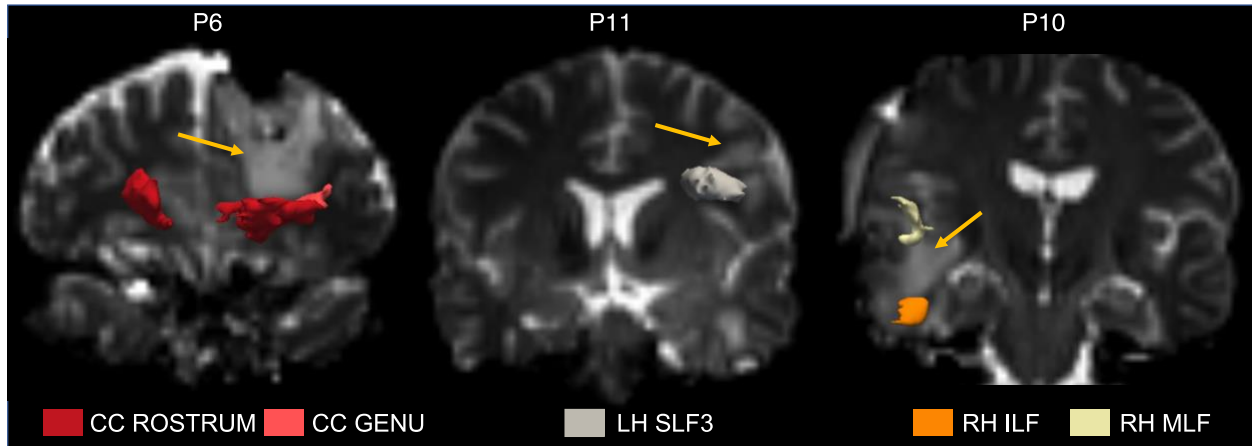

**Supplementary Figure S1.** Examples of successful TRACULA reconstructions in three patients with focal lesions. 3D tract reconstructions are shown on the  $b = 0 \text{ s/mm}^2$  dMRI volume thresholded at 20% of the maximum. Orange arrows point to the lesion. Coronal images are shown in radiological convention. Patient IDs correspond to table S2. CC GENU: genu of the corpus callosum; CC ROSTRUM: rostrum of the corpus callosum; LH SLF 3: third (most ventral) branch of the left superior longitudinal fasciculus. RH ILF: right inferior longitudinal fasciculus; RH MLF: right middle longitudinal fasciculus.

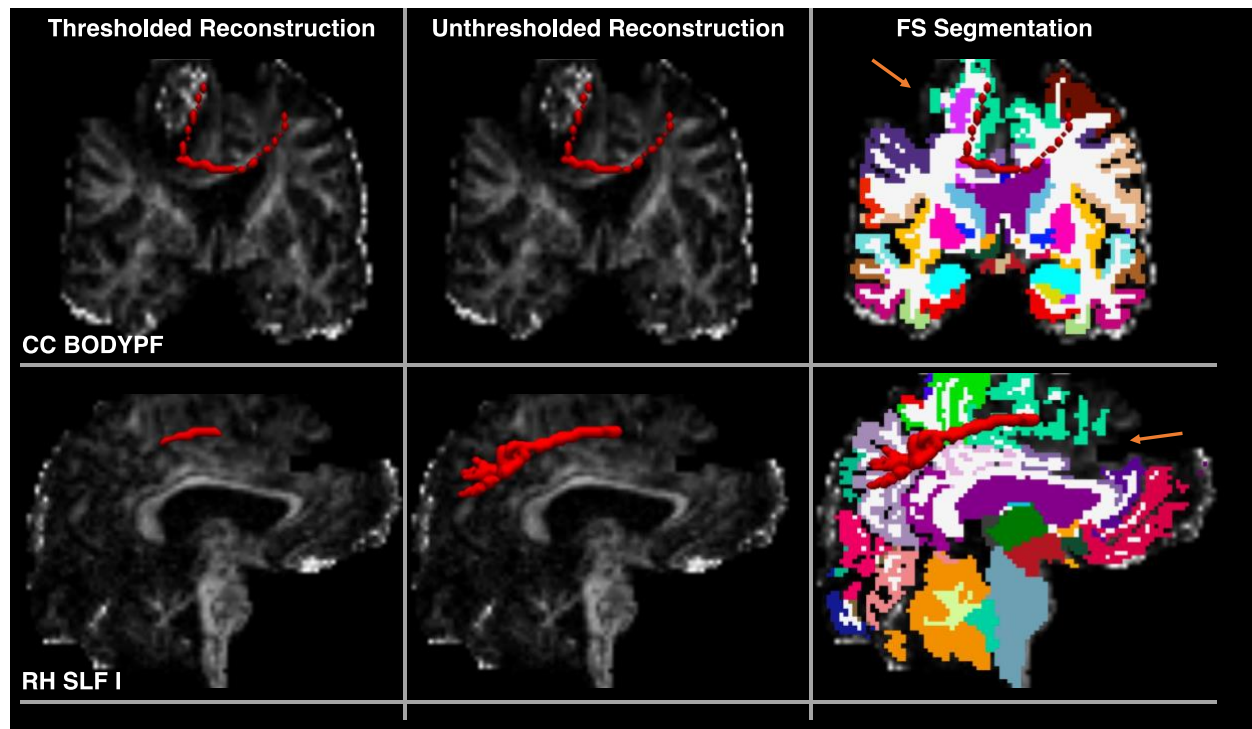

**Supplementary Figure S2.** Example of one failed and one partial TRACULA reconstructions for P14 (See table S2). RH SLFI: first (most dorsal) branch of the right superior longitudinal fasciculus. CC BODYPF: pre-frontal section of the corpus callosum. 3D tract reconstructions are shown on the fractional anisotropy scalar map for both thresholded (tract visitation maps thresholded at 20% of the maximum) and unthresholded posterior distributions. Unthresholded 3D reconstructions are also shown overlaid onto the FreeSurfer anatomical segmentation. Orange arrows point to regions where the segmentation was abnormal due to the presence of a large frontal focal lesion.

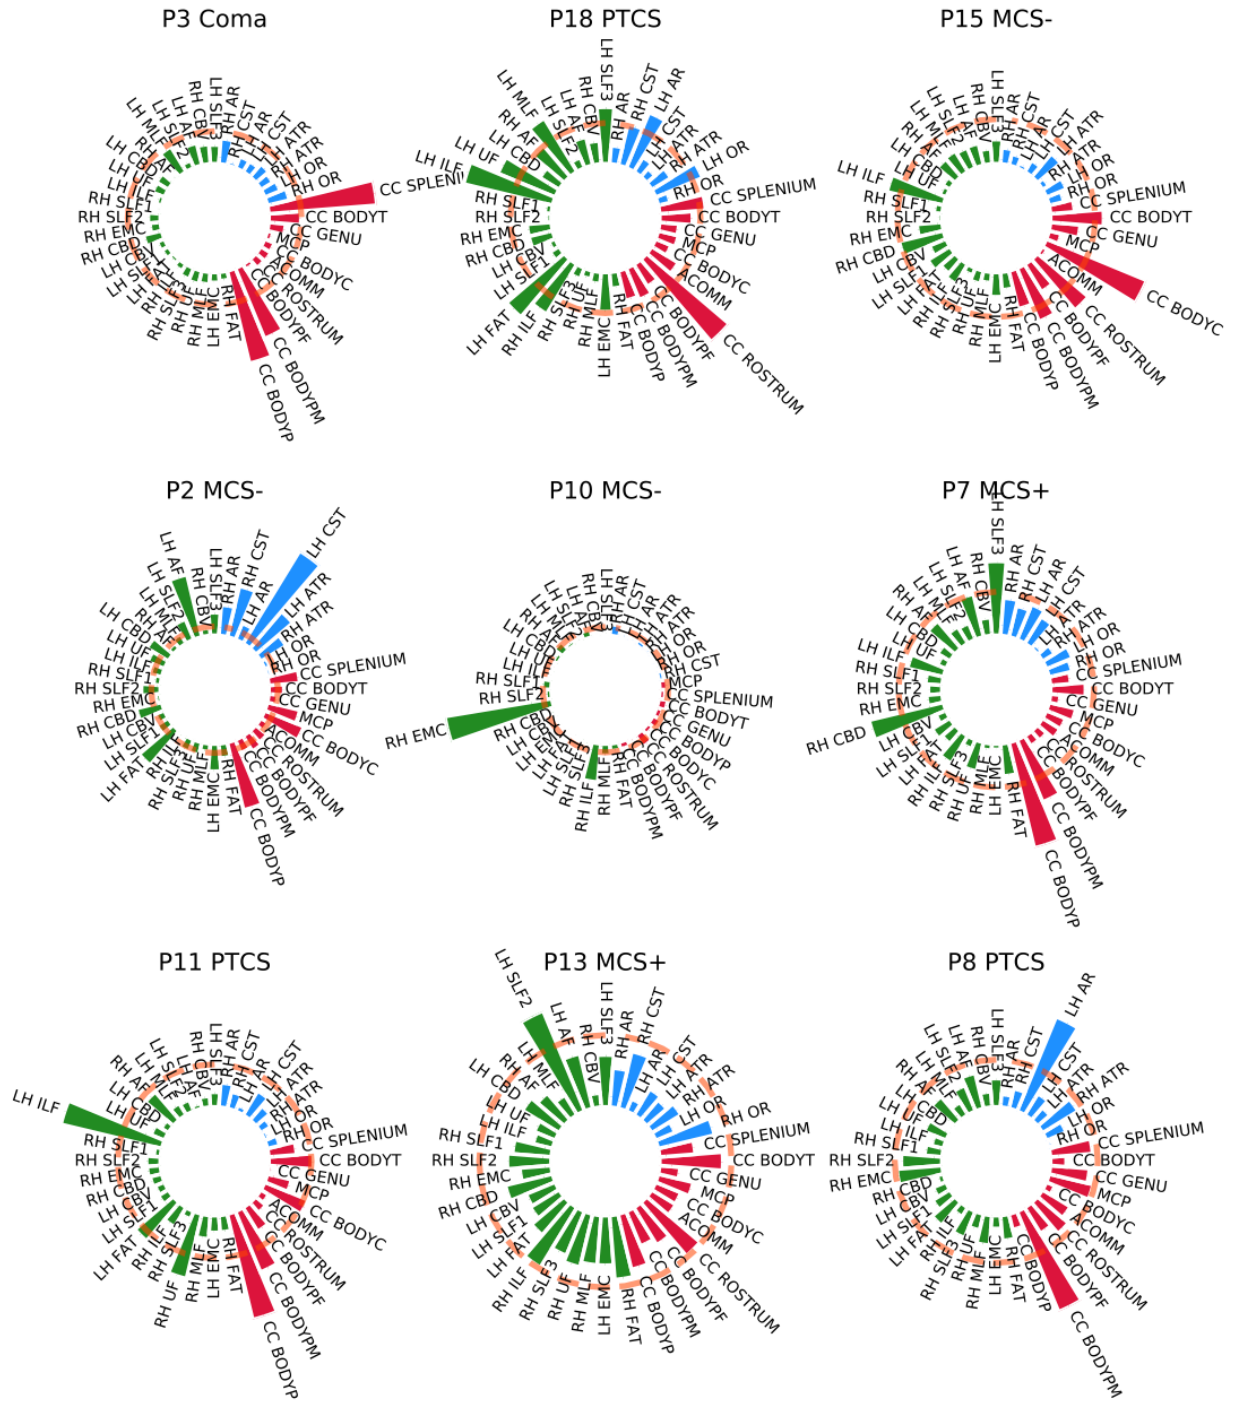

**Supplementary Figure S3.** The figure shows the individual tract profiles for nine out of 17 subjects with TBI (the remaining eight patients are shown in figure S4). The Mahalanobis distance for the 40 reconstructed tracts is plotted using polar bar plots. Tracts that resulted in either partial or failed reconstruction after reinitialization are not included in the individual profile of that patient. The pink dotted line corresponds to the critical value of the Chi-squared statistic at  $\alpha = 0.001$ . White matter tracts are grouped in commissural (red), associative (green), and projection pathways (blue). Level of consciousness at MRI for each patient is also reported (Coma; MCS+: minimally conscious state plus, evidence of language function (e.g., reproducible movement to command, object recognition, intelligible verbalization); MCS-: minimally conscious state minus, no evidence of language function, but shows at



least one behavior consistent with a minimally conscious state (e.g., automatic motor response); PTCS: post-traumatic confusional state; VS: vegetative state). For a complete list of WM tract abbreviations see table S2. Patient IDs correspond to table S2.

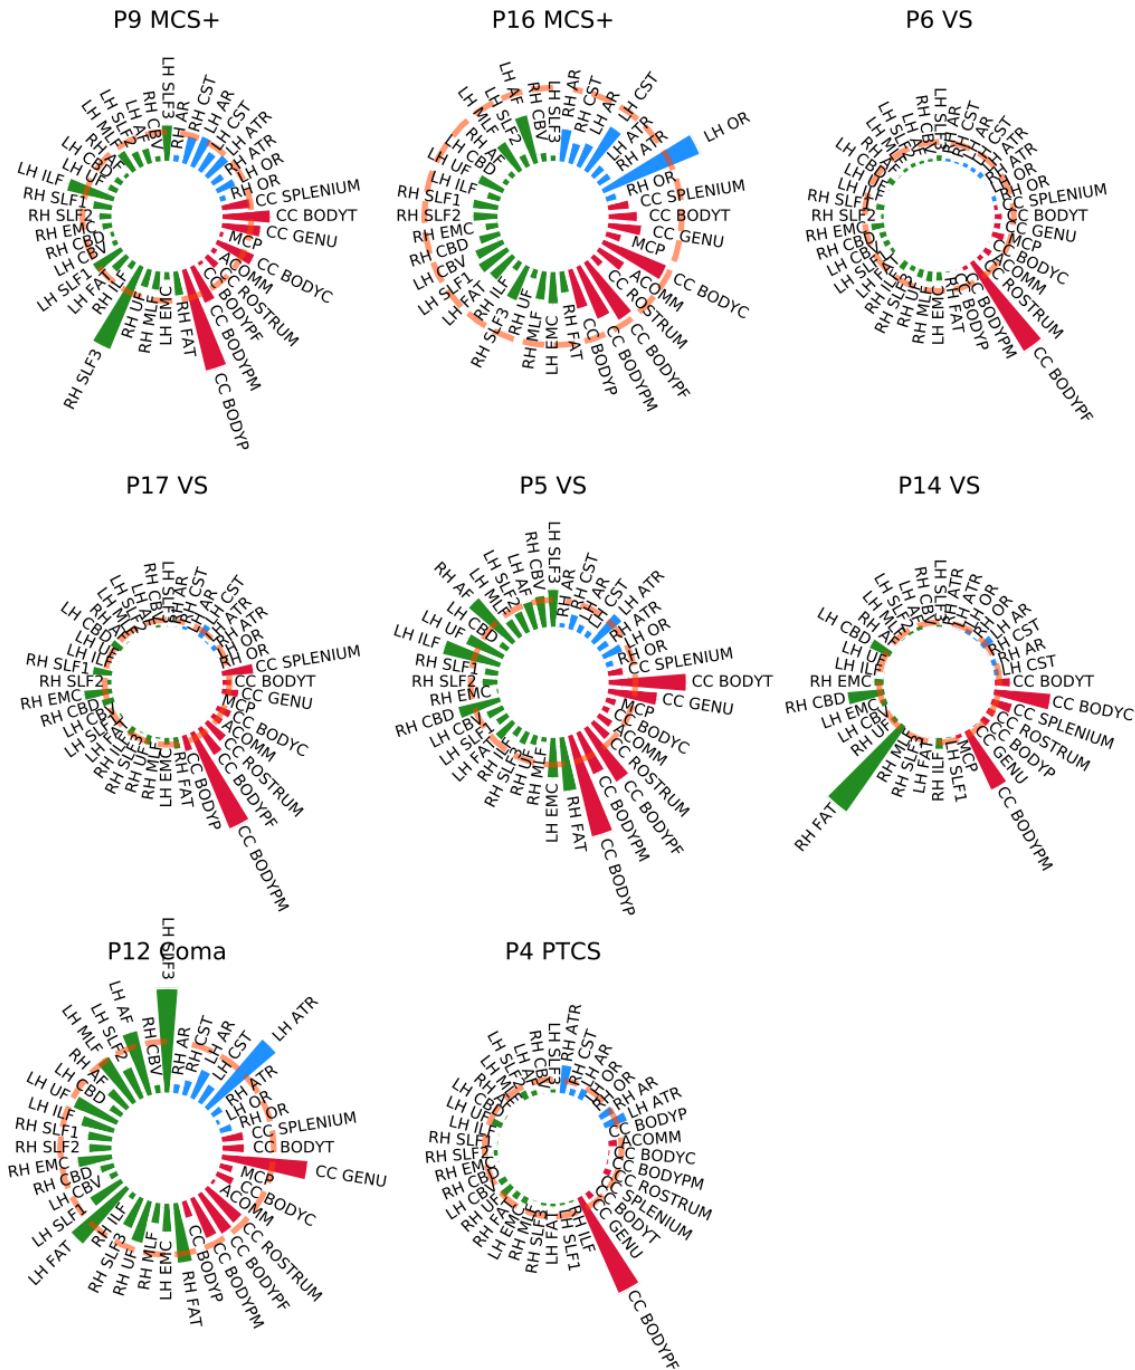

**Supplementary Figure S4. Individual Patient Profiles.** The figure shows the individual profiles for the remaining eight out of 17 patients. The Mahalanobis distance for the 40 reconstructed tracts is plotted using polar bar plots. Tracts that resulted in either partial or failed reconstruction after reinitialization are not included in the individual profile of that patient. The pink dotted line corresponds to the critical value of the Chi-squared statistic at  $\alpha = 0.001$ . White matter tracts are grouped in commissural (red), associative (green), and projection pathways (blue). Tracts that resulted in either partial or failed reconstruction after reinitialization are not included. Level of consciousness at MRI for each patient is also reported (Coma; MCS+: minimally conscious state plus, evidence of language function (e.g.,

reproducible movement to command, object recognition, intelligible verbalization); MCS-: minimally conscious state minus, no evidence of language function, but shows at least one behavior consistent with a minimally conscious state (e.g., automatic motor response); PTCS: post-traumatic confusional state; VS: vegetative state). For a complete list of WM tract abbreviations see table S2. Patient IDs correspond to table S2.

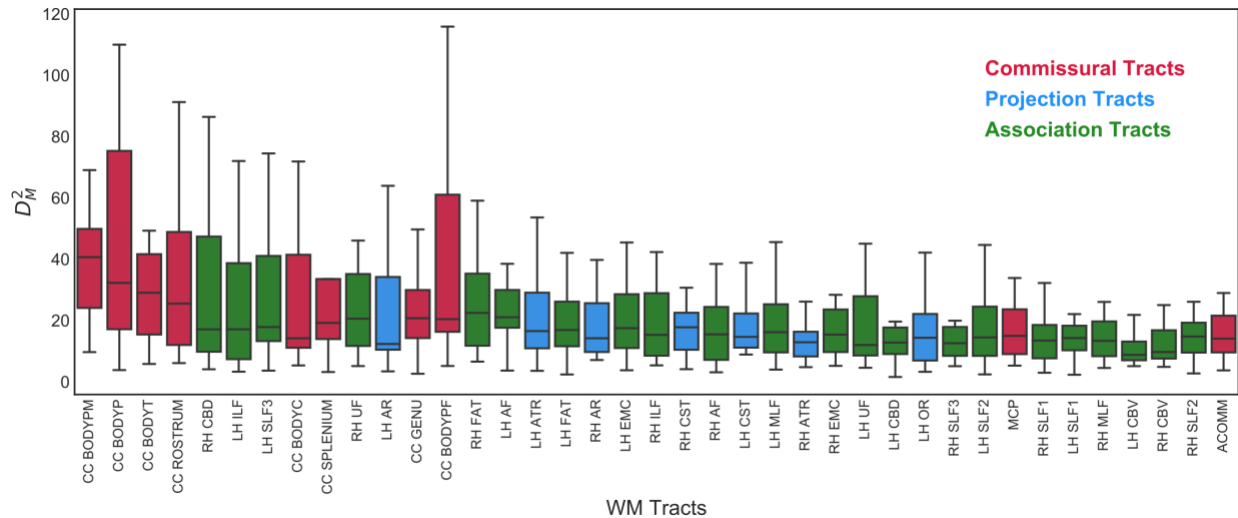

**Supplementary Figure S5.** The box plot reports the Mahalanobis distance ( $D^2_M$ ) for each tract across all subjects with TBI. Bar colors indicate the tract group: commissural (red), projection (blue), association (green). Tracts that resulted in either partial or failed reconstruction after reinitialization are not included. For a complete list of white matter (WM) tract abbreviations see table S2.

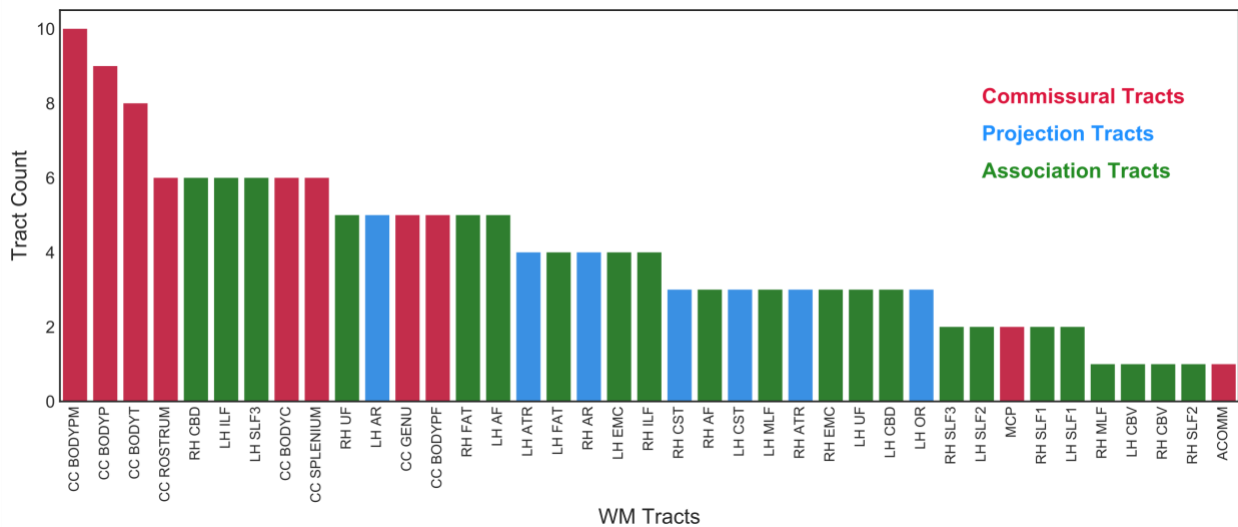

**Supplementary Figure S6.** The bar plot reports the number of times each tract resulted damaged across patients. Bar colors indicate the tract group: commissural (red), projection (blue), association (green). Tracts that resulted in either partial or failed reconstruction after reinitialization are not included. For a complete list of white matter (WM) tract abbreviations see table S2.

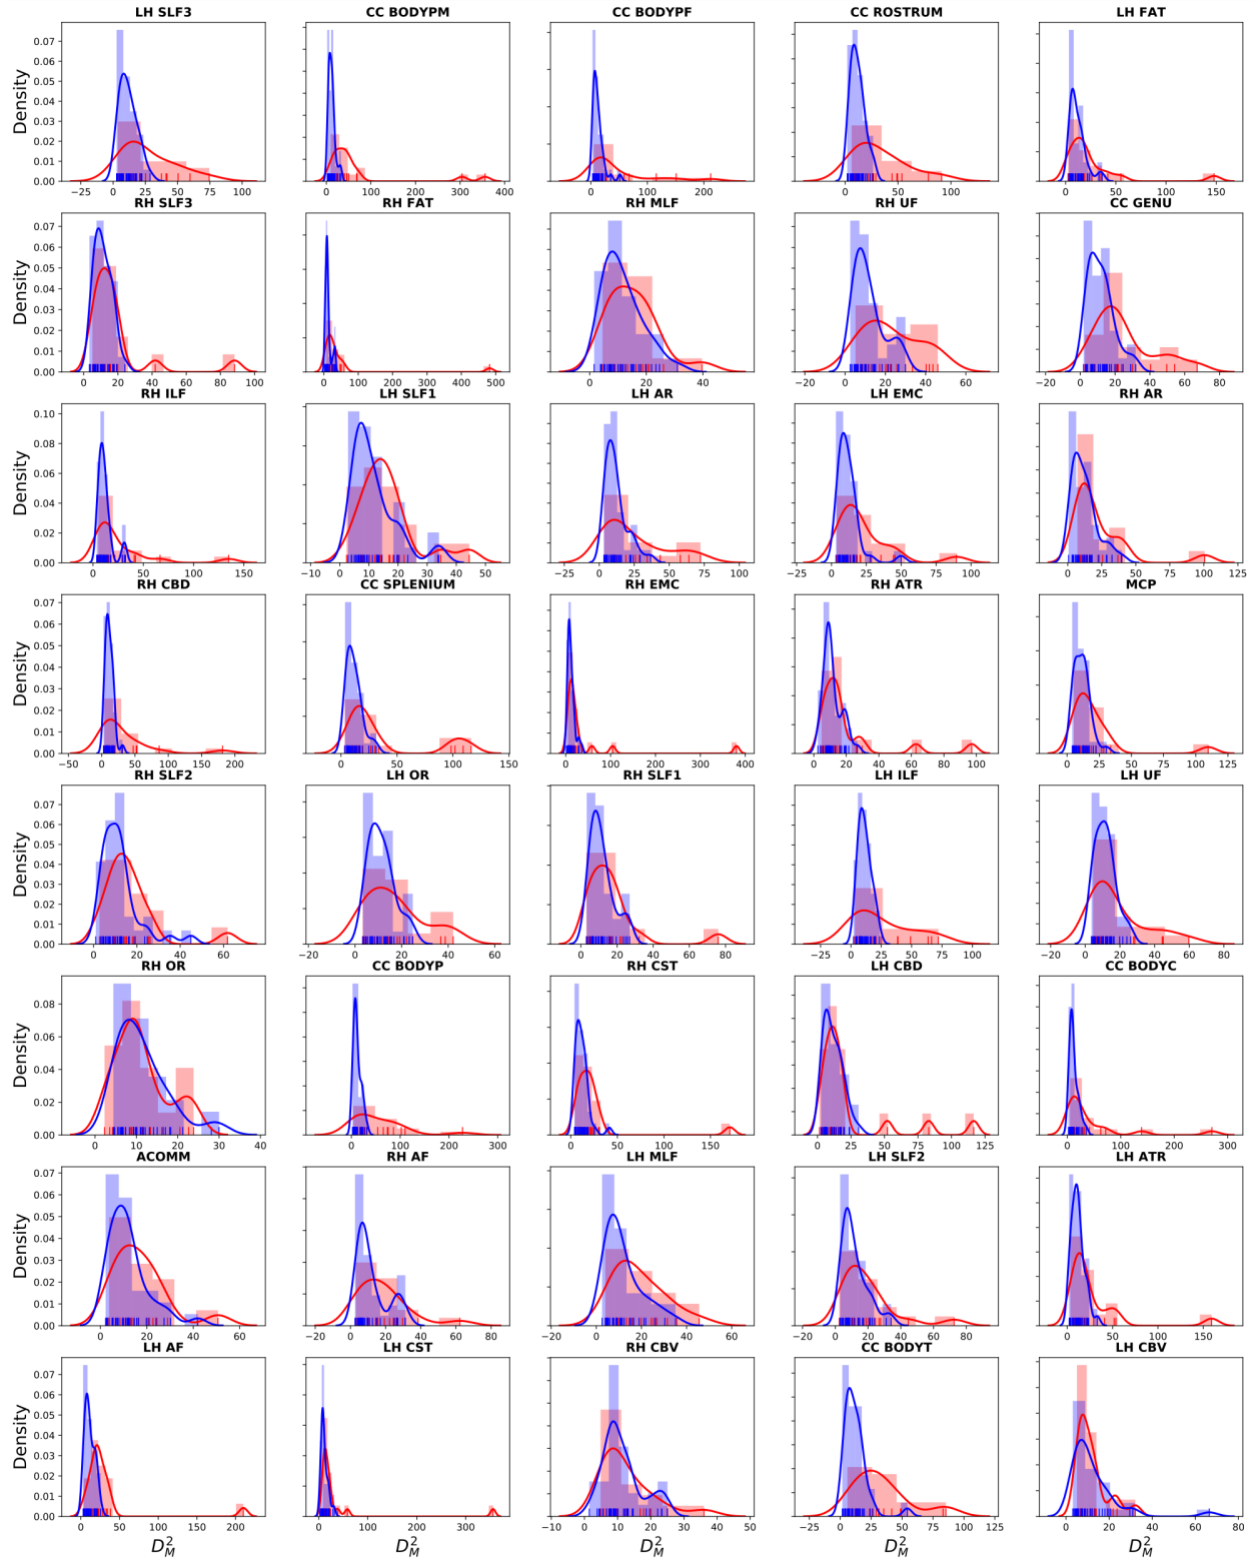

**Supplementary Figure S7.** Probability density functions of Mahalanobis distance values ( $D_M^2$ ) are shown for patients (red) and controls (blue) for each of the 40 reconstructed tracts. For a complete list of WM tract abbreviations see table S2.

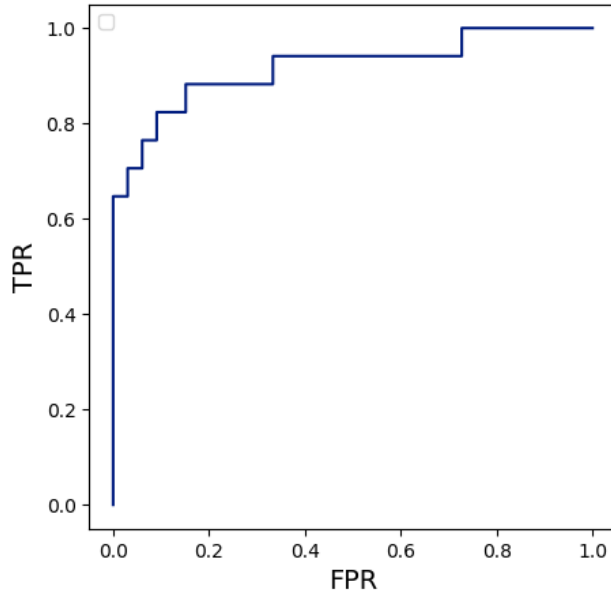

**Supplementary Figure S8.** Receiver operator characteristic (ROC) curve shows the performance of the multivariate pipeline in discriminating between patients and controls. FPR: false positive rate; TPR: true positive rate.

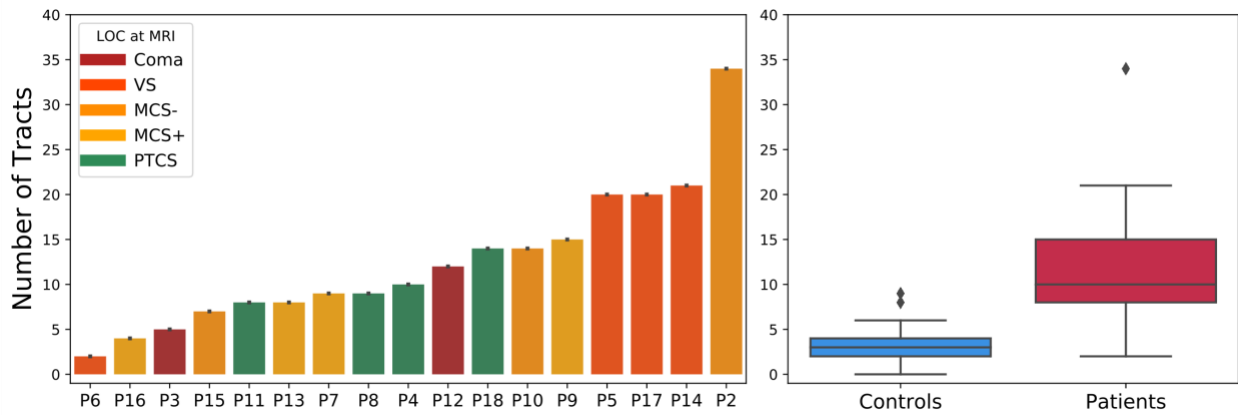

**Supplementary Figure S9.** The figure reports the results of the multivariate analysis when removing for each subject the tracts that needed to be reinitialized (i.e., using only the tracts that were successfully reconstructed in TRACULA without manual intervention) (See table S2). **Left panel)** The number of extreme WM tracts is shown for each subject with TBI. A tract was considered extreme if its  $p$  - value, correspondent to a Chi-square statistic, was  $< 0.001$  ( $p < 0.05$  corrected for multiple comparisons across 40 tracts). Patients are ordered based on the number of damaged tracts. The color of the bars reflects the level of consciousness (LOC) at the day of MRI. IDs corresponding to those used in Table S2 ( $P2, \dots, P18$ ) are indicated for each patient. **Right panel)** Boxplots showing the number of extreme tracts for controls and patients. Asterisk indicate a significant difference (Wilcoxon sum rank test :  $W = 4.79$ ,  $p = 1.64e - 6$ ).

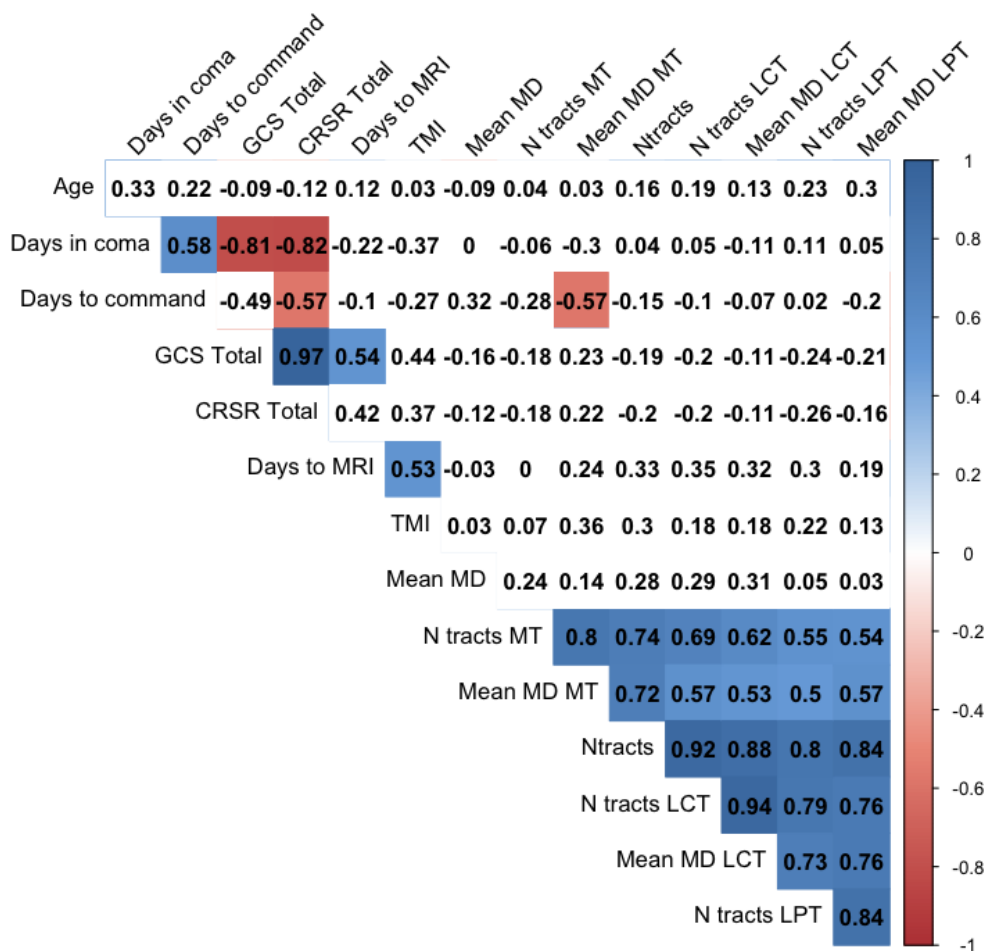

**Supplementary Figure S10.** The figure shows the correlation matrix investigating the relationship between continuous dependent, independent, and potential confounding variables used in our primary and secondary analyses. The correlation coefficient (*rho*) is displayed in the cell. Cells for variables that are significantly correlated at  $p > 0.05$  level are shaded in. Warmer colors reflect higher negative correlations. Cooler colors reflect higher positive correlations. MD = average Mahalanobis distance of affected tracts, Ntracts = number of affected tracts, GCS = Glasgow Coma Scale, CRS-R = Coma Recovery Scale-Revised, TMI = Total Motion Index, MT = Motor Tracts, LPT = Language Production Tracts, LCT = Language Comprehension Tracts.
